# Supplementary material
Source: ML conference proceedings conference paper supplement (https://openreview.net/forum?id=PBPeqABctr)
Supplement: supplementary_material [file attachment]

## A PROOF OF AXIOMS

SENSITIVITY PROOF. Given that:

$$\mathbb{E}_{\hat{x}=u(\tilde{x}), \tilde{x} \sim B_{\frac{\epsilon}{2}}(x)} [L(\hat{x}; y, w) - L(x; y, w)] = \sum_{i=1}^n \mathbb{E}_{\hat{x}=u(\tilde{x}), \tilde{x} \sim B_{\frac{\epsilon}{2}}(x)} \left[ (\hat{x}_i - \tilde{x}_i) \cdot \frac{\partial L(\tilde{x}; y, w)}{\partial \tilde{x}_i} \right] \quad (1)$$

the total attribution on the right side equals the expected change in the loss function. A change in the loss function necessarily results in a non-zero attribution on the right, proving sensitivity.  $\square$

## B IMPLEMENTATION INVARIANCE PROOF

IMPLEMENTATION INVARIANCE PROOF. The Local Attribution (LA) algorithm adheres to the chain rule. Based on the properties of gradients, the LA algorithm satisfies implementation invariance, ensuring that results are consistent across different valid implementations of the same functional relationship.  $\square$

## C PROOF OF $\epsilon$ -Local Space

PROOF. Consider the functions  $u^u$  and  $u^t$  defined for perturbation within the local space:

$$\begin{aligned} u^u(\tilde{x}) &= \tilde{x} + \frac{\epsilon}{2} \cdot \text{sign} \left( \frac{\partial L(\tilde{x}, y, w)}{\partial \tilde{x}} \right) \\ u^t(\tilde{x}) &= \tilde{x} - \frac{\epsilon}{2} \cdot \text{sign} \left( \frac{\partial L(\tilde{x}, y^t, w)}{\partial \tilde{x}} \right) \\ |\tilde{x} \cdot x| &\leq \frac{\epsilon}{2} \\ u^u(\tilde{x}) - \tilde{x} &= \frac{\epsilon}{2} \cdot \text{sign} \left( \frac{\partial L(\tilde{x}, y, w)}{\partial \tilde{x}} \right) \\ -\frac{\epsilon}{2} &\leq \frac{\epsilon}{2} \cdot \text{sign} \left( \frac{\partial L(\tilde{x}, y, w)}{\partial \tilde{x}} \right) \leq \frac{\epsilon}{2} \\ |\hat{x} - x| &= |\hat{x} - \tilde{x} + \tilde{x} - x| \leq \epsilon \\ &\text{thus confirming presence within the } \epsilon\text{-Local Space.} \end{aligned} \quad (2)$$

$\square$

## D PROOF OF SPACE CONSTRAINT

PROOF OF SPACE CONSTRAINT. The iterative process for updating positions in an adversarial example generation context can be described as follows:

$$\begin{aligned} x_u^k &= x + \frac{\epsilon}{2} \cdot \text{sign} \left( \frac{\partial L(x_u^{k-1}; y, w)}{\partial x_u^{k-1}} \right) \\ x_t^k &= x - \frac{\epsilon}{2} \cdot \text{sign} \left( \frac{\partial L(x_t^k, y^t, w)}{\partial x_t^{k-1}} \right) \end{aligned}$$

where  $x_u$  denotes the untargeted attack, and  $x_t$  denotes the targeted attack. We assert the following constraint on the adversarial perturbation:

$$\left| x_u^k - x \right| = \left| \frac{\epsilon}{2} \cdot \text{sign} \left( \frac{\partial L(x_u^{k-1}; y, w)}{\partial x_u^{k-1}} \right) \right| \leq \frac{\epsilon}{2}, \text{ maintaining presence within the } \epsilon\text{-Local Space.}$$

The same reasoning applies to  $x_t^k$ , demonstrating that each iterative step remains within the designated local space.  $\square$

## E PSEUDOCODE

---

### Algorithm 1 Local Attribution (LA)

---

**Input:** sample  $x$ , number of iterations  $N$ , loss function  $L$ , Spatial Range(number of target)  $s$ , model parameters  $w$

**Output:**  $A$

```

1:  $A = \mathbf{0}$    $\mathbf{0} = [0, 0, \dots, 0] \in \mathbb{R}^n$ 
2:  $x_u^0 = x_t^0 = x$ 
3: for  $k$  in  $\text{range}(N)$  do
4:    $x_u^k = x + \frac{\epsilon}{2} \cdot \text{sign} \left( \frac{\partial L(x_u^{k-1}; y, w)}{\partial x_u^{k-1}} \right)$ 
5:    $A += \frac{\epsilon}{2} \cdot \text{sign} \left( \frac{\partial L(x_u^{k-1}; y, w)}{\partial x_u^{k-1}} \right) \cdot \frac{\partial L(x_u^{k-1}; y, w)}{\partial x_u^{k-1}}$ 
6: end for
7: for  $i$  in  $\text{range}(s)$  do
8:   for  $k$  in  $\text{range}(N)$  do
9:      $x_t^k = x + \frac{\epsilon}{2} \cdot \text{sign} \left( \frac{\partial L(x_t^{k-1}; y^t, w)}{\partial x_t^{k-1}} \right)$ 
10:     $A -= \frac{\epsilon}{2} \cdot \text{sign} \left( \frac{\partial L(x_t^{k-1}; y^t, w)}{\partial x_t^{k-1}} \right) \cdot \frac{\partial L(x_t^{k-1}; y^t, w)}{\partial x_t^{k-1}}$ 
11:   end for
12: end for
13: return  $A$ 
```

---

## F EXPERIMENTAL RESULTS

**Table 1: The result of replicated the experiments from previous works**

| Method     | Inception-v3 |          | ResNet-50 |          | VGG16     |          | MaxViT-T  |          |
|------------|--------------|----------|-----------|----------|-----------|----------|-----------|----------|
|            | Insertion    | Deletion | Insertion | Deletion | Insertion | Deletion | Insertion | Deletion |
| FIG        | 0.201722     | 0.045629 | 0.106266  | 0.032358 | 0.07933   | 0.027029 | 0.462121  | 0.182173 |
| EG         | 0.375499     | 0.265265 | 0.350081  | 0.28264  | 0.356653  | 0.337217 | 0.598585  | 0.515332 |
| DeepLIFT   | 0.295152     | 0.041533 | 0.124774  | 0.030503 | 0.09342   | 0.023026 | 0.498488  | 0.181546 |
| GIG        | 0.318705     | 0.034337 | 0.144963  | 0.019132 | 0.10252   | 0.017318 | 0.545019  | 0.138792 |
| IG         | 0.320825     | 0.04258  | 0.145412  | 0.028333 | 0.095863  | 0.023163 | 0.541594  | 0.18818  |
| SG         | 0.38911      | 0.033278 | 0.277219  | 0.022857 | 0.186208  | 0.016392 | 0.641634  | 0.139467 |
| BIG        | 0.48401      | 0.053815 | 0.290461  | 0.046713 | 0.226557  | 0.037233 | 0.568201  | 0.186599 |
| SM         | 0.533356     | 0.0631   | 0.31544   | 0.056741 | 0.270308  | 0.041743 | 0.489565  | 0.195568 |
| MFABA      | 0.538468     | 0.063881 | 0.320002  | 0.055452 | 0.279122  | 0.040634 | 0.440624  | 0.358368 |
| AGI        | 0.572294     | 0.058431 | 0.500747  | 0.051438 | 0.397331  | 0.042029 | 0.645392  | 0.198408 |
| AttEXplore | 0.618792     | 0.044244 | 0.504209  | 0.033338 | 0.442779  | 0.0282   | 0.615814  | 0.15773  |
| LA (our)   | 0.646301     | 0.067499 | 0.549666  | 0.047156 | 0.437295  | 0.03378  | 0.704771  | 0.208705 |

**Table 2: The result on 1000 images from the ILSVRC 2012**

| Method     | Inception-v3 |          | ResNet-50 |          | VGG16     |          | MaxViT-T  |          |
|------------|--------------|----------|-----------|----------|-----------|----------|-----------|----------|
|            | Insertion    | Deletion | Insertion | Deletion | Insertion | Deletion | Insertion | Deletion |
| FIG        | 0.041396     | 0.05868  | 0.028387  | 0.041294 | 0.018308  | 0.028613 | 0.018308  | 0.028613 |
| DeepLIFT   | 0.065667     | 0.046959 | 0.039129  | 0.028892 | 0.028824  | 0.016541 | 0.028824  | 0.016541 |
| GIG        | 0.077912     | 0.027204 | 0.045593  | 0.016607 | 0.033138  | 0.011634 | 0.033138  | 0.011634 |
| IG         | 0.078717     | 0.030372 | 0.045788  | 0.022333 | 0.031213  | 0.015054 | 0.031213  | 0.015054 |
| SG         | 0.152161     | 0.026479 | 0.11807   | 0.015998 | 0.10324   | 0.012112 | 0.10324   | 0.012112 |
| BIG        | 0.157666     | 0.069774 | 0.103139  | 0.060935 | 0.06877   | 0.039905 | 0.06877   | 0.039905 |
| SM         | 0.070064     | 0.043584 | 0.05795   | 0.03228  | 0.0426    | 0.019605 | 0.0426    | 0.019605 |
| MFABA      | 0.228086     | 0.070928 | 0.121357  | 0.068072 | 0.086451  | 0.042018 | 0.086451  | 0.042018 |
| EG         | 0.333171     | 0.376207 | 0.260612  | 0.300023 | 0.176334  | 0.155098 | 0.176334  | 0.155098 |
| AGI        | 0.29917      | 0.068373 | 0.310282  | 0.057212 | 0.209355  | 0.037446 | 0.209355  | 0.037446 |
| AttEXplore | 0.30662      | 0.062042 | 0.237887  | 0.046649 | 0.18695   | 0.037588 | 0.18695   | 0.037588 |
| LA         | 0.416221     | 0.054769 | 0.417947  | 0.044304 | 0.301272  | 0.029915 | 0.301272  | 0.029915 |

**Table 3: The result of replicated the experiments from previous works on 1000 images from the ILSVRC 2012**

| Method     | Inception-v3 |          | ResNet-50 |          | VGG16     |          | MaxViT-T  |          |
|------------|--------------|----------|-----------|----------|-----------|----------|-----------|----------|
|            | Insertion    | Deletion | Insertion | Deletion | Insertion | Deletion | Insertion | Deletion |
| FIG        | 0.144397     | 0.032023 | 0.087252  | 0.029646 | 0.060985  | 0.019745 | 0.434148  | 0.171334 |
| DeepLIFT   | 0.218215     | 0.029595 | 0.10331   | 0.026814 | 0.07006   | 0.01611  | 0.485588  | 0.169753 |
| GIG        | 0.233052     | 0.022558 | 0.123626  | 0.01724  | 0.079532  | 0.012764 | 0.542341  | 0.117117 |
| IG         | 0.225676     | 0.026889 | 0.112144  | 0.022977 | 0.0688    | 0.015629 | 0.530153  | 0.171547 |
| EG         | 0.303453     | 0.300624 | 0.323657  | 0.300264 | 0.195079  | 0.178762 | 0.523863  | 0.457302 |
| SG         | 0.293349     | 0.020552 | 0.232979  | 0.018048 | 0.140715  | 0.013417 | 0.6432    | 0.111883 |
| BIG        | 0.357469     | 0.036464 | 0.227733  | 0.04042  | 0.175332  | 0.02891  | 0.527154  | 0.176192 |
| SM         | 0.396799     | 0.040684 | 0.254677  | 0.046277 | 0.208166  | 0.030726 | 0.481034  | 0.175937 |
| AGI        | 0.423038     | 0.042443 | 0.379195  | 0.044985 | 0.255715  | 0.030216 | 0.607887  | 0.165533 |
| MFABA      | 0.396052     | 0.040035 | 0.257576  | 0.045806 | 0.214512  | 0.029935 | 0.419738  | 0.307159 |
| AttEXplore | 0.463166     | 0.029513 | 0.402695  | 0.029542 | 0.309154  | 0.02236  | 0.58905   | 0.129836 |
| LA (our)   | 0.495721     | 0.046036 | 0.446708  | 0.037803 | 0.320236  | 0.023418 | 0.676405  | 0.177876 |

## G ATTRIBUTION RESULTS

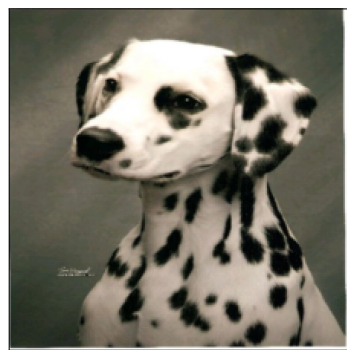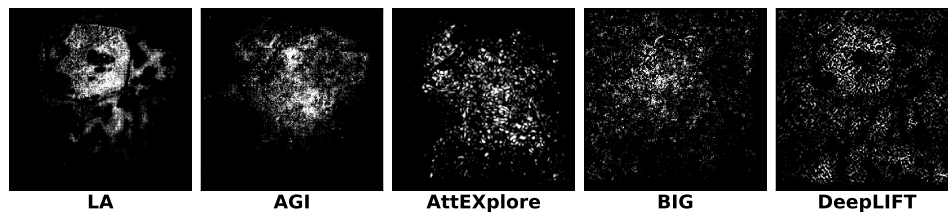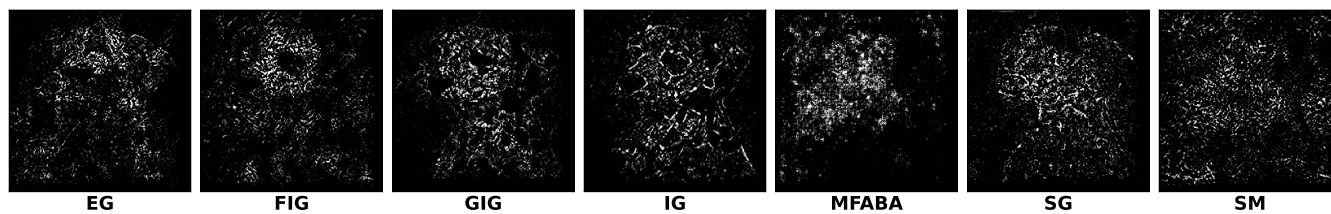

Figure 1: Attribution Results on the Inception-v3

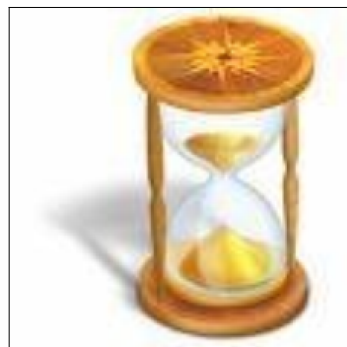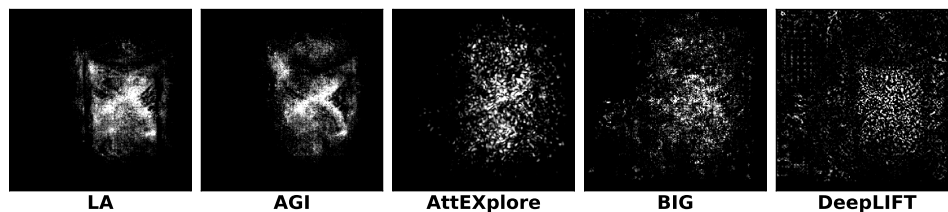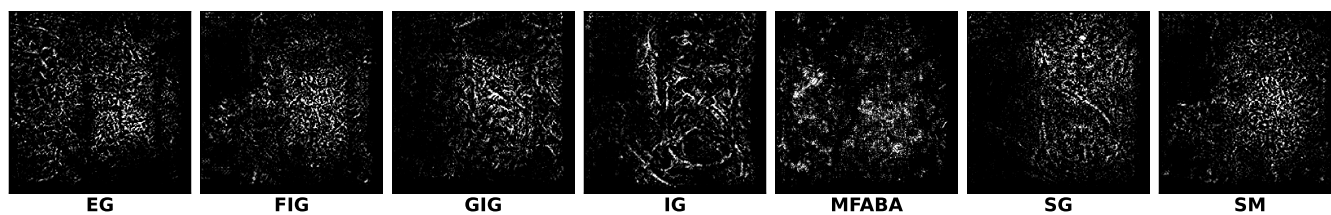

Figure 2: Attribution Results on the Inception-v3

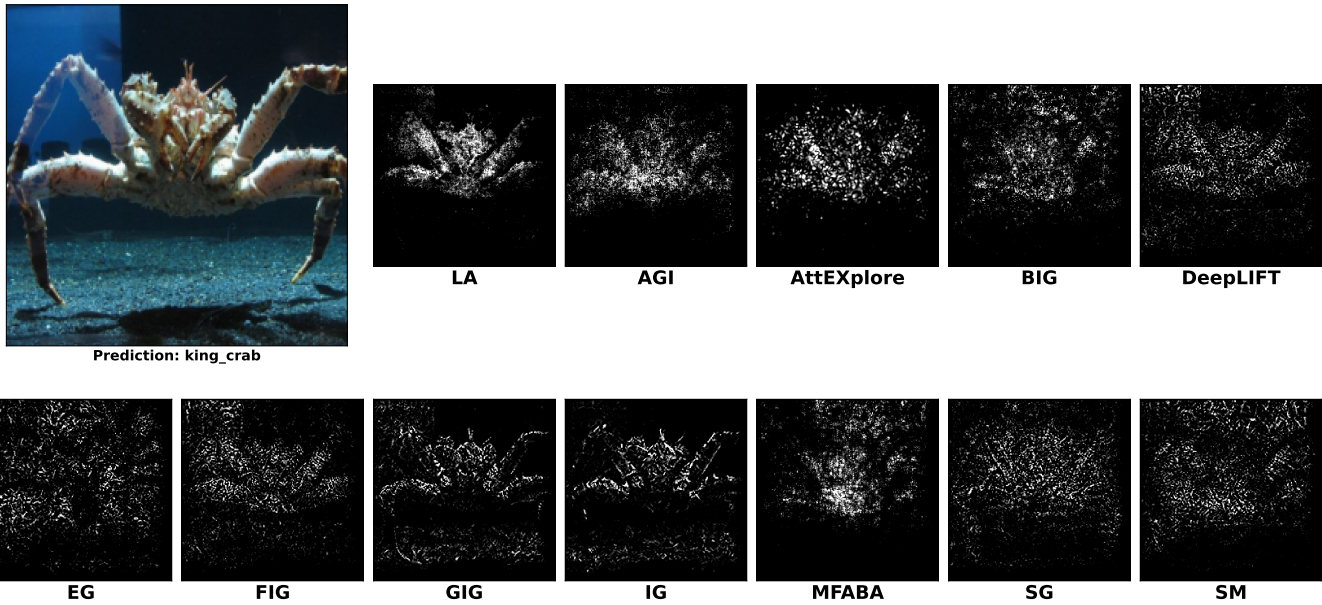

Figure 3: Attribution Results on the Inception-v3

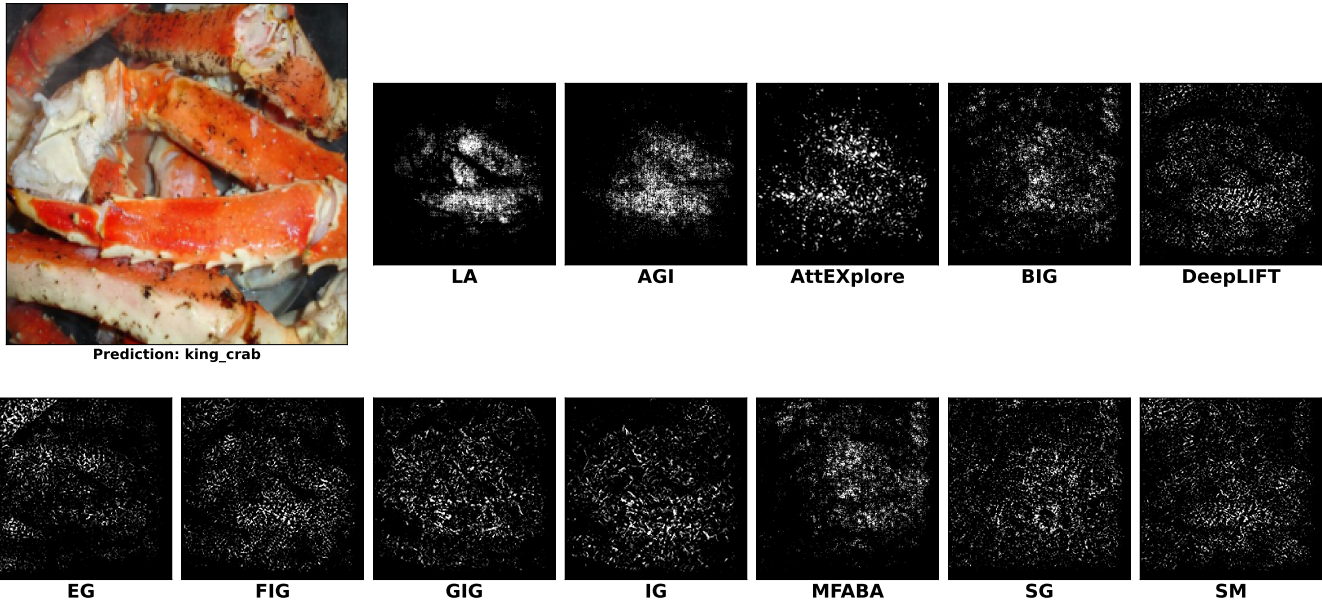

Figure 4: Attribution Results on the Inception-v3



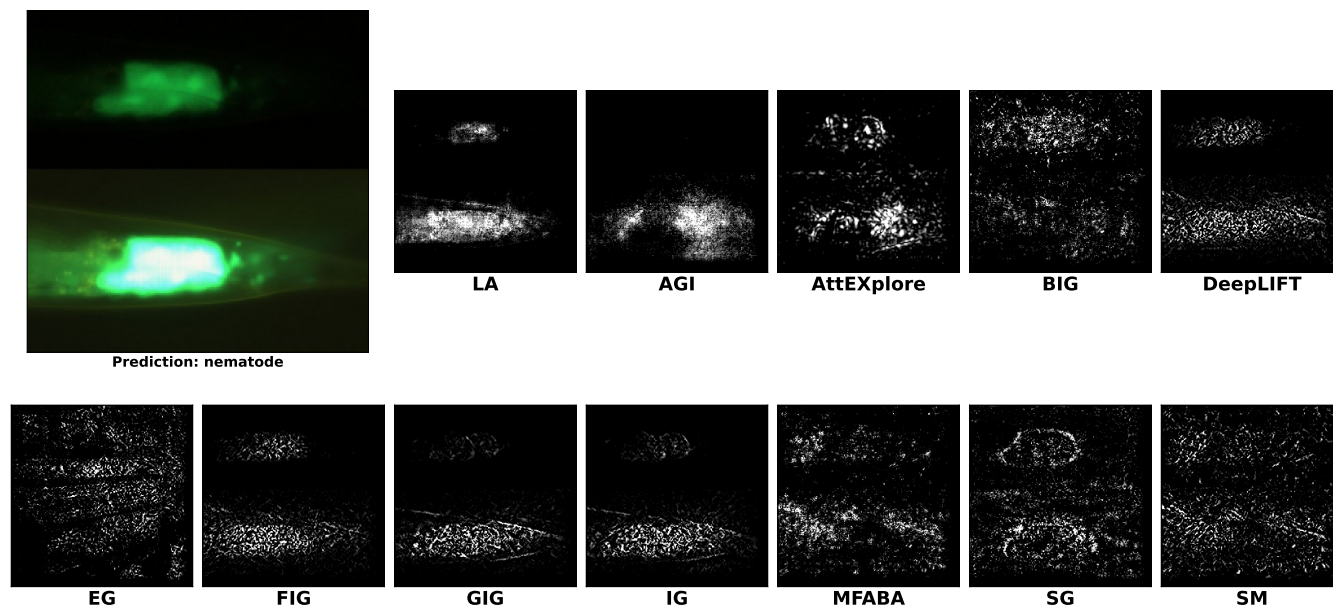

Figure 5: Attribution Results on the Inception-v3

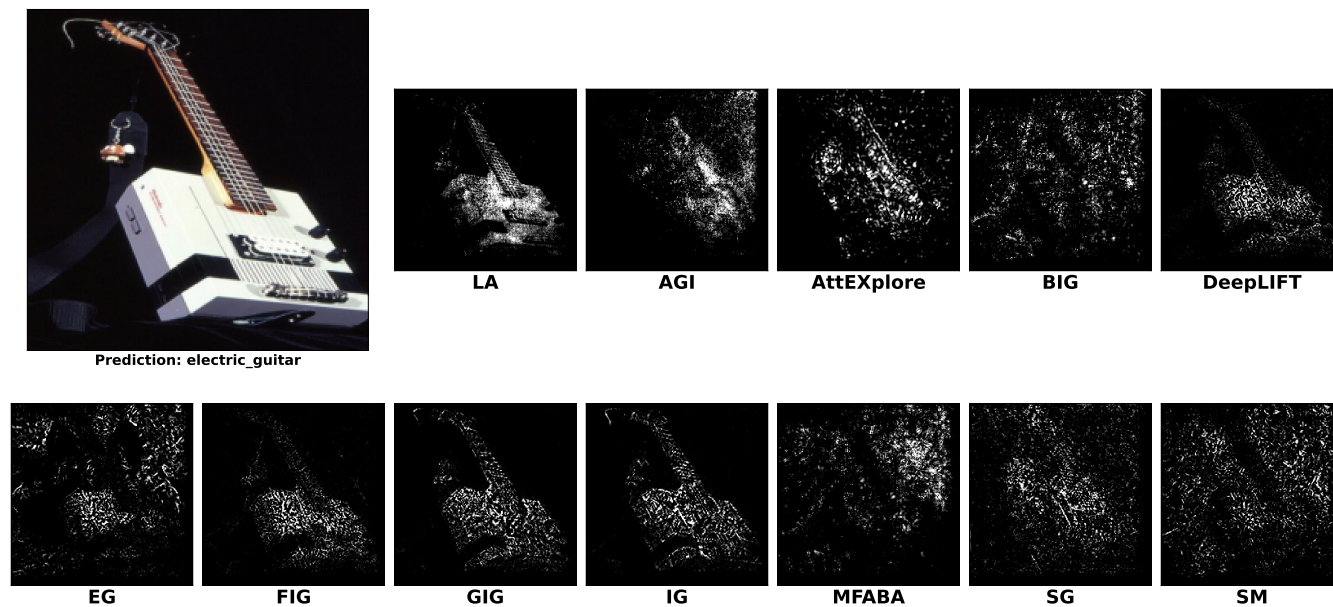

Figure 6: Attribution Results on the Inception-v3

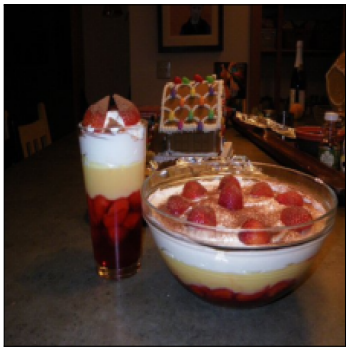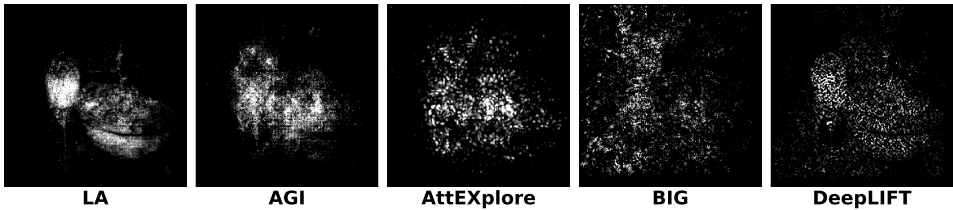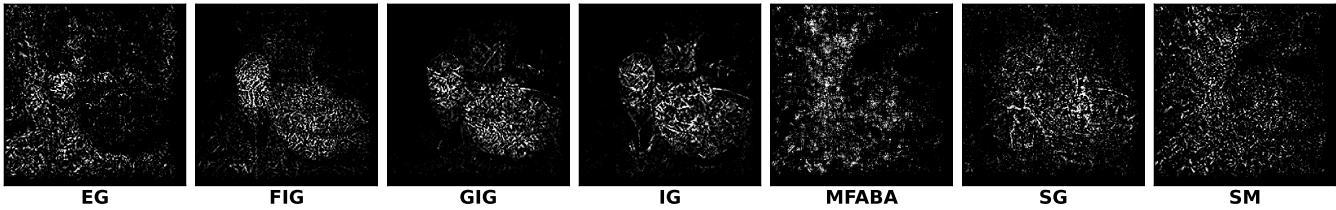

Figure 7: Attribution Results on the Inception-v3

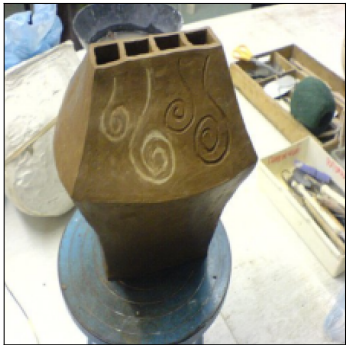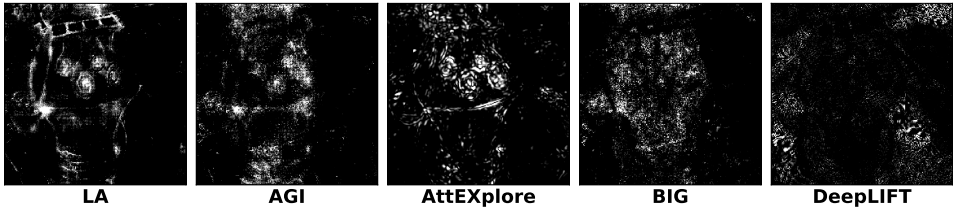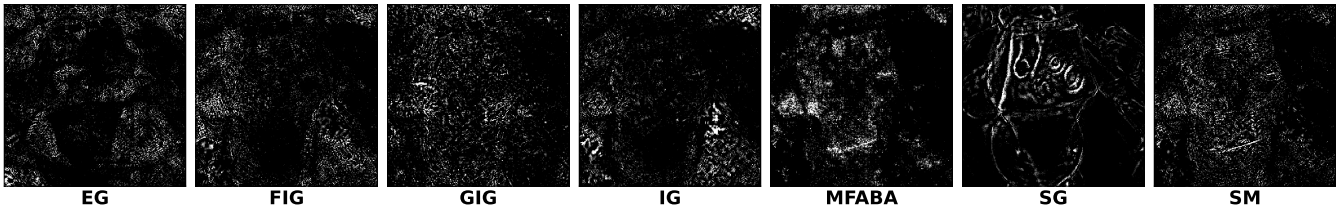

Figure 8: Attribution Results on the MaxViT-T

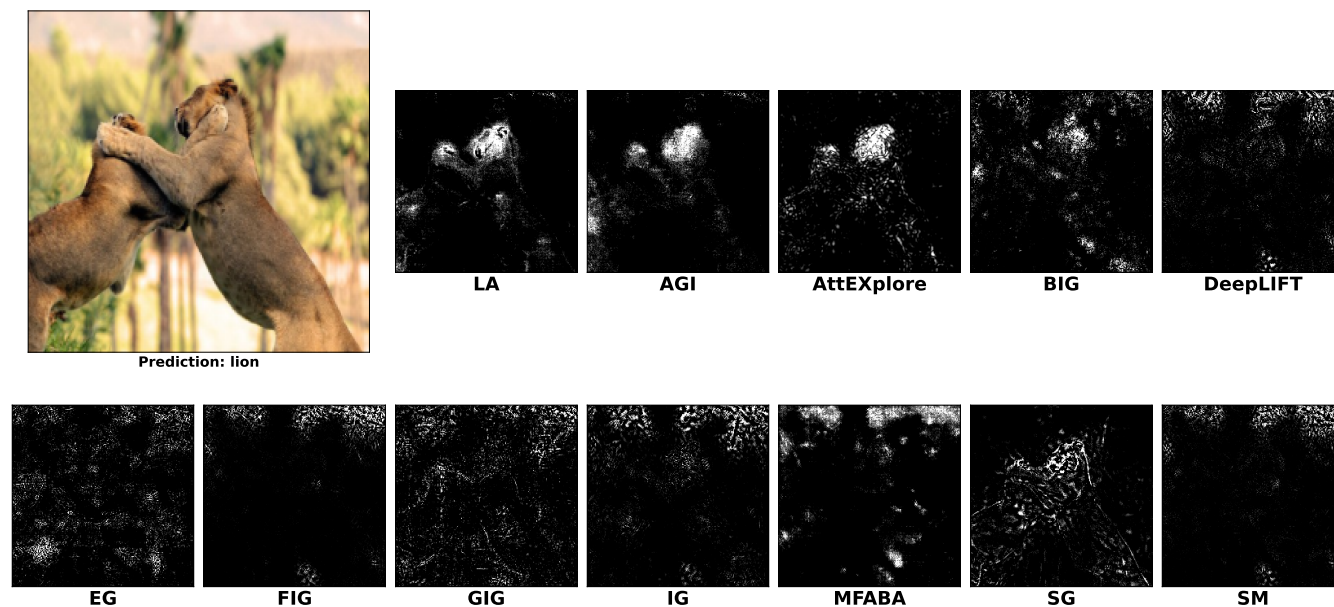

Figure 9: Attribution Results on the MaxViT-T

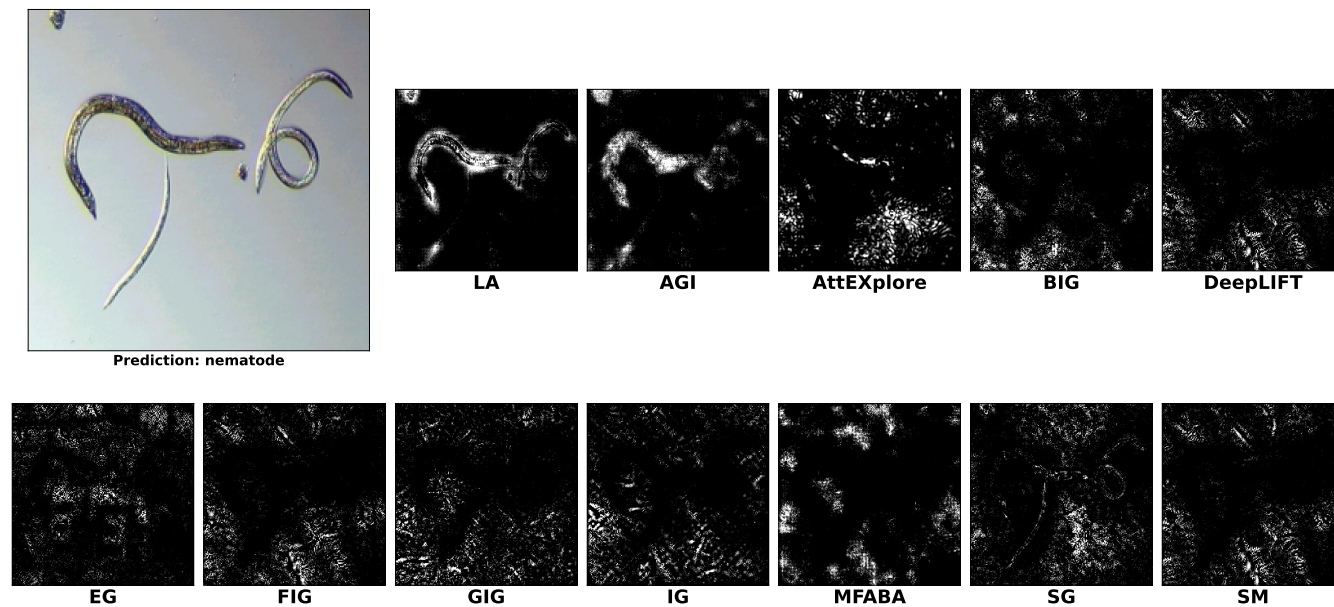

Figure 10: Attribution Results on the MaxViT-T



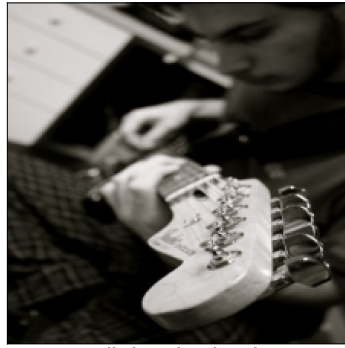

Prediction: electric\_guitar

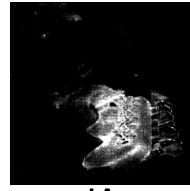

LA

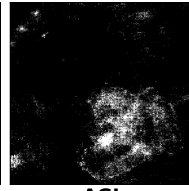

AGI

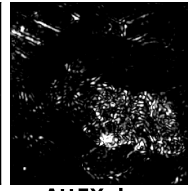

AttEXplore

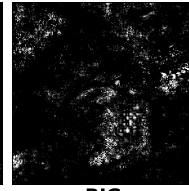

BIG

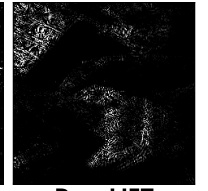

DeepLIFT

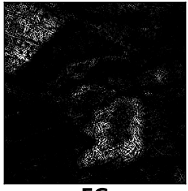

EG

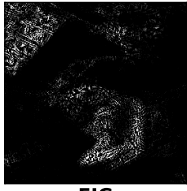

FIG

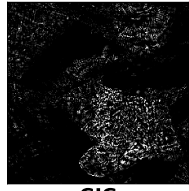

GIG

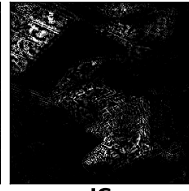

IG

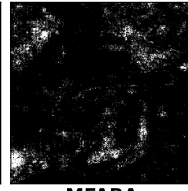

MFABA

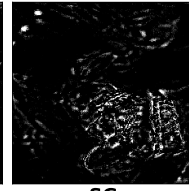

SG

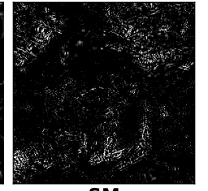

SM

Figure 11: Attribution Results on the MaxViT-T

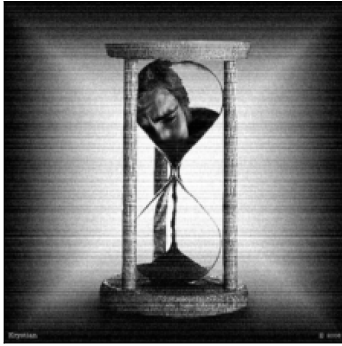

Prediction: hourglass

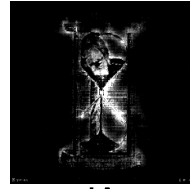

LA

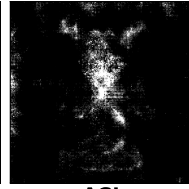

AGI

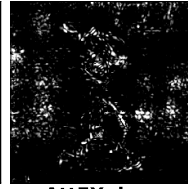

AttEXplore

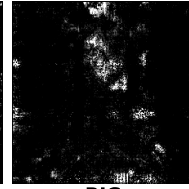

BIG

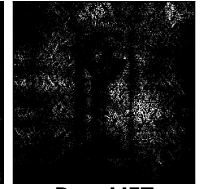

DeepLIFT

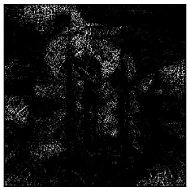

EG

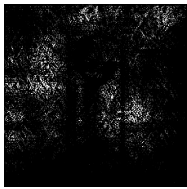

FIG

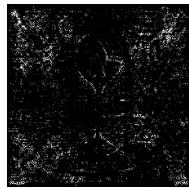

GIG

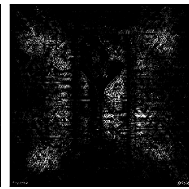

IG

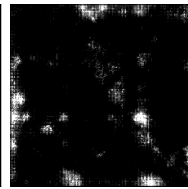

MFABA

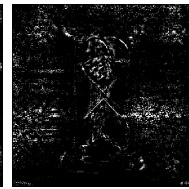

SG

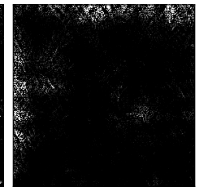

SM

Figure 12: Attribution Results on the MaxViT-T

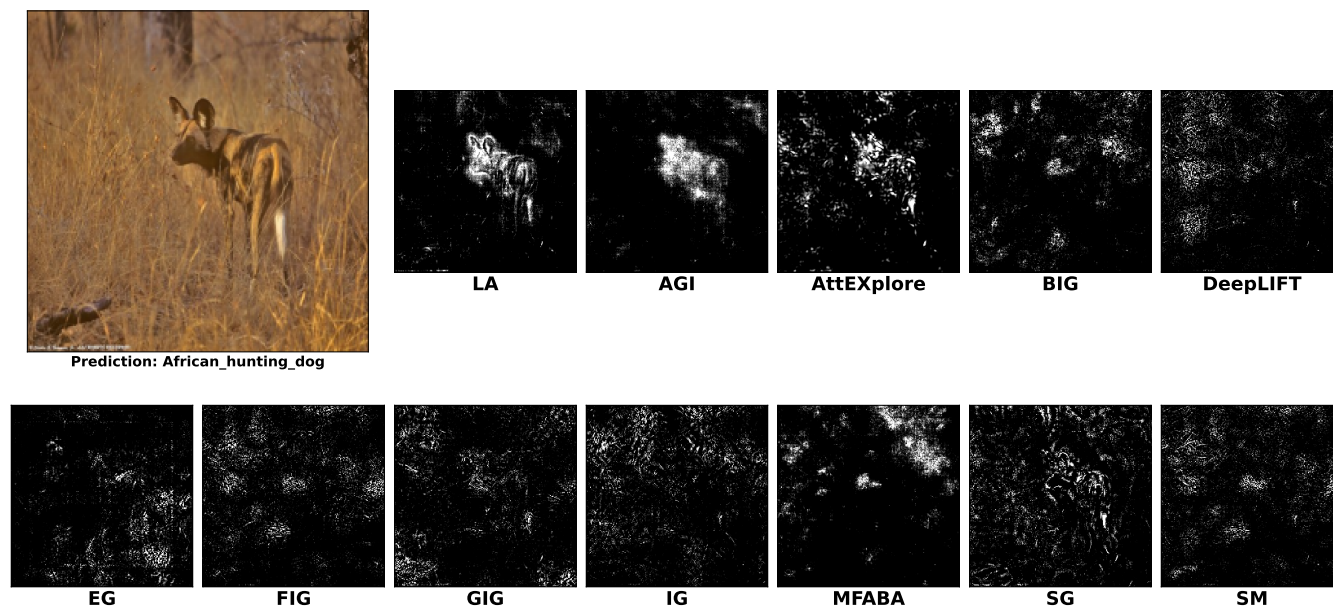

Figure 13: Attribution Results on the MaxViT-T

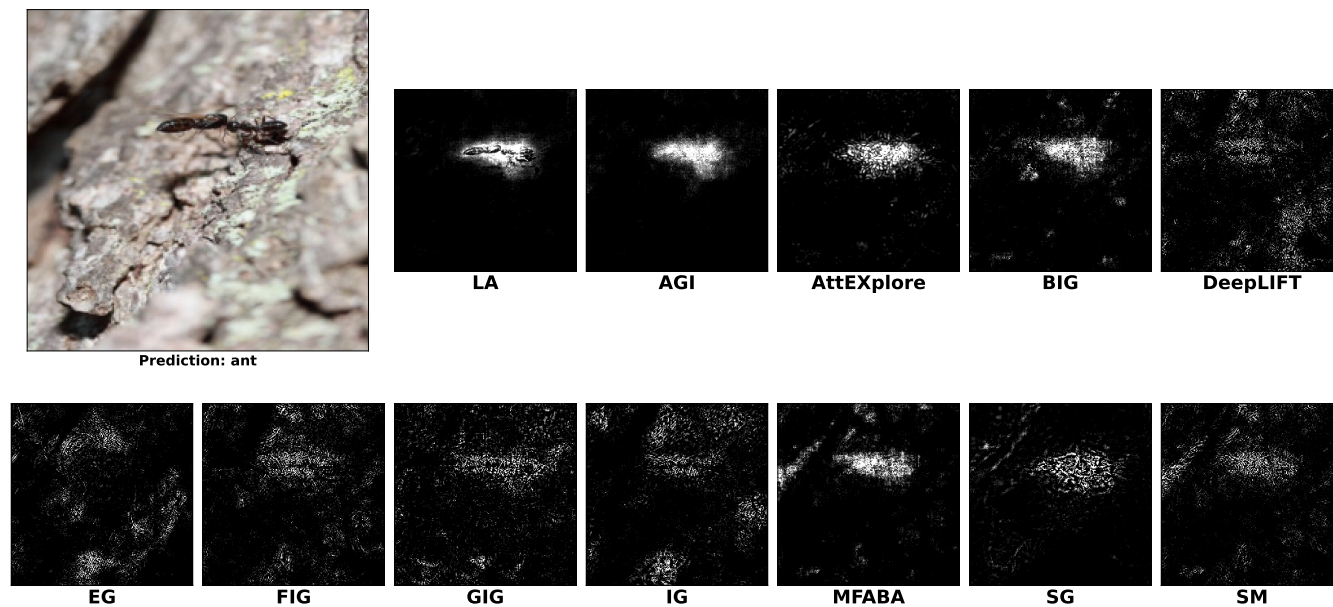

Figure 14: Attribution Results on the MaxViT-T
